# Supplementary material for: 3D-printed flexible supercapacitors with multi-level bonded configuration via ion cross-linking
Source: Royal Society of Chemistry journal article supplement (doi:10.1039/d2ta04379c), 2022-01-01
Supplement: d2ta04379c1.pdf [file d2ta04379c1.pdf]

## Supporting Information

### **3D-Printed Flexible Supercapacitors with Multi-Level Bonded Configuration via Ion Cross-linking.**

*Jiayu Yang<sup>a, b</sup>, Yuxuan Wang<sup>a</sup>, Junjie Du<sup>a</sup>, Fan Bu<sup>a</sup>, Qinghe Cao<sup>a</sup>, Ting Meng<sup>a</sup>, Xi Xu<sup>a, b</sup>, and Cao Guan<sup>a, b</sup>\**

<sup>a</sup>Frontiers Science Center for Flexible Electronics, Institute of Flexible Electronics, Northwestern Polytechnical University, Xi'an 710072, P. R. China

<sup>b</sup>Ningbo Institute of Northwestern Polytechnical University, Northwestern Polytechnical University, Ningbo, 315103, China.

E-mail: [iamcguan@nwpu.edu.cn](mailto:iamcguan@nwpu.edu.cn).

## Calculations

Areal capacitance ( $C_A$ ), volumetric capacitance ( $C_V$ ) and specific capacitance ( $C$ ) of supercapacitors are calculated based on the galvanostatic charging and discharging curves according to the following equations:

$$C_A = \frac{I \times t}{\Delta V \times A} \quad (1)$$

$$C_V = \frac{I \times t}{\Delta V \times V} \quad (2)$$

$$C = \frac{I \times t}{\Delta V \times m} \quad (3)$$

where  $C_A$ ,  $C_V$  and  $C$  are the areal, volumetric and specific capacitance, respectively.  $I$  is the discharge current,  $t$  is the discharge time,  $\Delta V$  is the working voltage,  $A$  is the effective active area of the supercapacitor,  $V$  is the total volume of the supercapacitor and  $m$  is the mass loading of the total device. Areal energy density ( $E_A$ ) and corresponding power density ( $P_A$ ) of supercapacitors are calculated according to the following equations:

$$E_A = \frac{1000}{2 \times 3600} \times C_A \times \Delta V^2 \quad (4)$$

$$P_A = \frac{3600 \times E_A}{t} \quad (5)$$

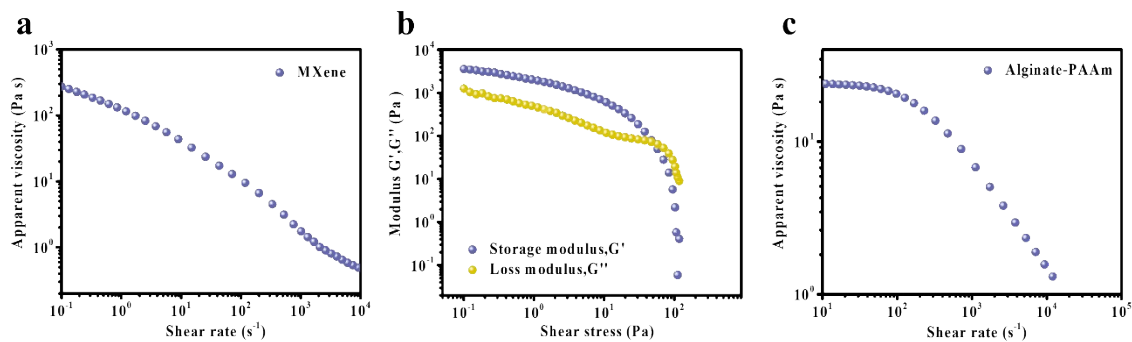

**Figure S1.** a) Apparent viscosity as a function of shear rate for the MXene ink. b) The storage ( $G'$ ) and loss moduli ( $G''$ ) as a function of shear stress for MXene ink. c) Apparent viscosity as a function of shear rate for the Alginate-PAAM gel-like electrolyte.

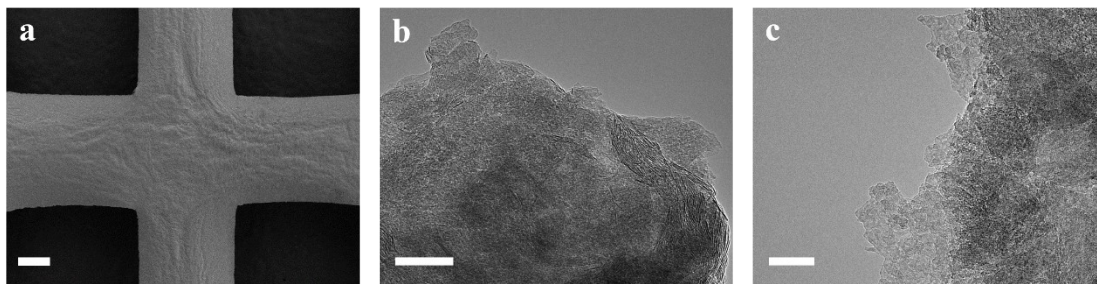

**Figure S2.** a) SEM image of the sequentially bridged Ca-alginate/MXene electrode. b, c) TEM images of the sequentially bridged Ca-alginate/MXene electrode. Scale bars: a) 200  $\mu\text{m}$ , b, c) 50 nm.

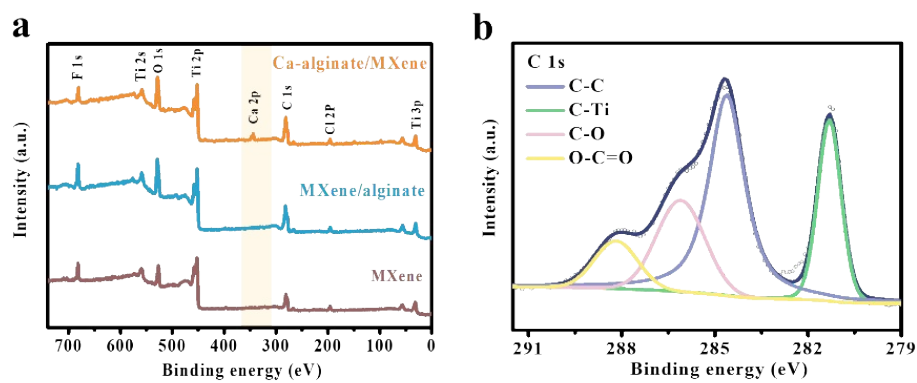

**Figure S3.** a) XPS spectra of Ca-alginate/MXene, MXene/alginate, and MXene. b) XPS spectra C 1s for MXene/alginate.

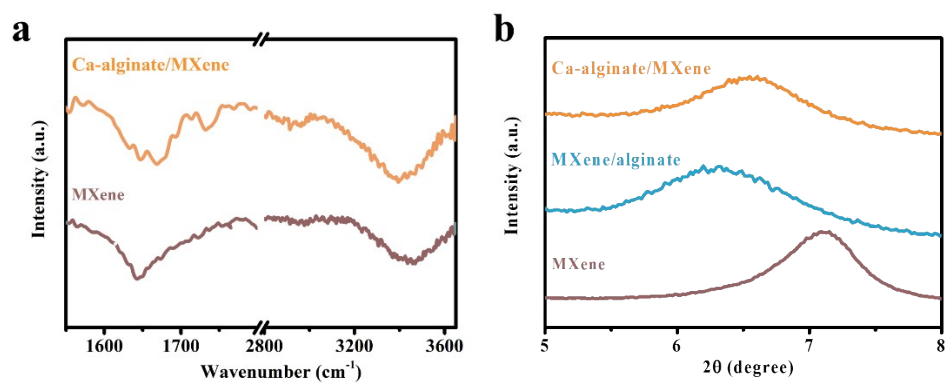

**Figure S4.** a) FTIR spectra for the Ca-alginate/MXene, and MXene. b) XRD patterns of Ca-alginate/MXene, MXene/alginate, and MXene.

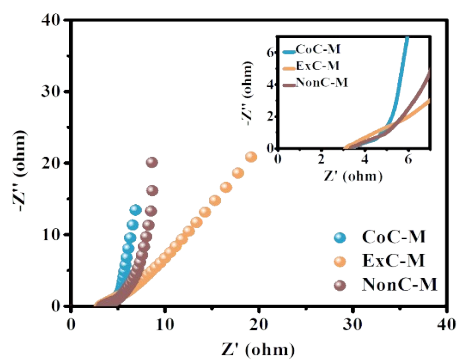

**Figure S5.** Nyquist plots of CoC-M, ExC-M, and NonC-M supercapacitors.

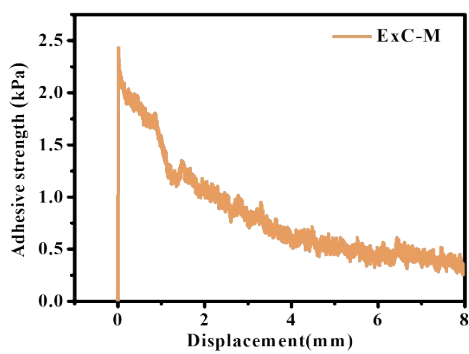

**Figure S6.** The adhesive strength of the ExC-M supercapacitor.

**Table 1** The comparison of the flexibility, durability and electrochemical performance with literature reports on flexible supercapacitors.

| <b>Ref.</b> | <b>Capacitance</b>                                     | <b>Deformations</b> | <b>Durability</b> | <b>Capacity retention</b> |
|-------------|--------------------------------------------------------|---------------------|-------------------|---------------------------|
| This work   | 2.7 F cm <sup>-2</sup><br>(7 mA cm <sup>-2</sup> )     | Bending             | 1500 times        | 96.9%                     |
| 1           | 0.273 mF cm <sup>-2</sup><br>(300 mV s <sup>-1</sup> ) | Bending             | 100 times         | 75%                       |
| 2           | 3.3 mF cm <sup>-2</sup><br>(0.02 mA cm <sup>-2</sup> ) | Bending             | 1200 times        | 92%                       |
| 3           | 81.5 μF cm <sup>-2</sup><br>(0.1 V s <sup>-1</sup> )   | Bending             | 1800 times        | 87.5%                     |
| 4           | 580 μF cm <sup>-2</sup><br>(5.8 μA cm <sup>-2</sup> )  | Bending             | 1000 times        | 93%                       |
| This work   | 2.7 F cm <sup>-2</sup><br>(7 mA cm <sup>-2</sup> )     | Stretching          | 2000 times        | 83.2%                     |
| 5           | 216.2 mF cm <sup>-2</sup><br>(10 mV s <sup>-1</sup> )  | Stretching          | 1000 times        | 75%                       |
| 6           | 450 mF cm <sup>-2</sup><br>(1 mA cm <sup>-2</sup> )    | Stretching          | 1000 times        | 78%                       |
| 7           | 23.2 F g <sup>-1</sup><br>(0.5 A g <sup>-1</sup> )     | Stretching          | 1000 times        | 81%                       |

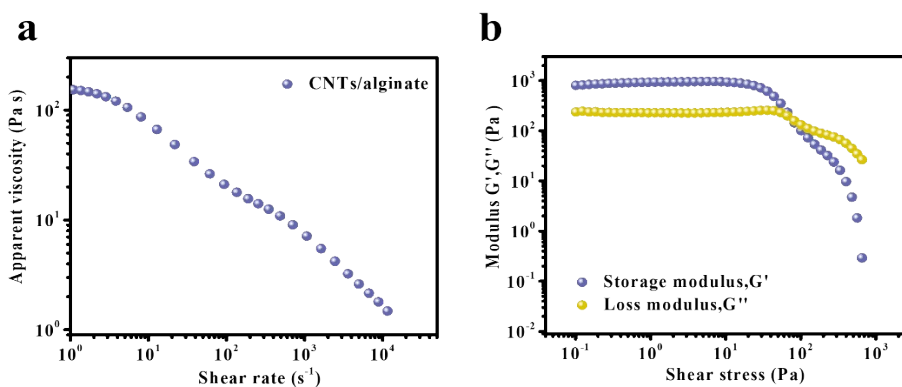

**Figure S7.** a,b) Rheological behaviors of printable CNTs/alginate ink. a) Apparent viscosity in terms of shear rate for the CNTs/alginate ink. b) The storage ( $G'$ ) and loss moduli ( $G''$ ) as a function of shear stress for CNTs/alginate ink.

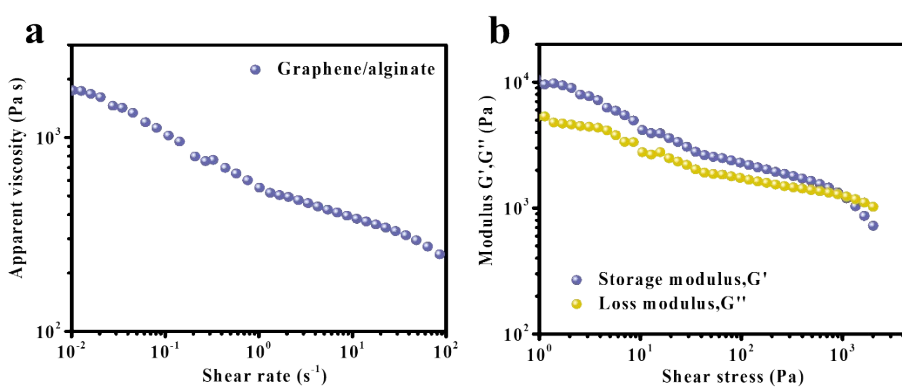

**Figure S8.** a,b) Rheological behaviors of printable Graphene/alginate ink. a) Apparent viscosity in terms of shear rate for the Graphene/alginate ink. b) The storage ( $G'$ ) and loss moduli ( $G''$ ) as a function of shear stress for Graphene/alginate ink.

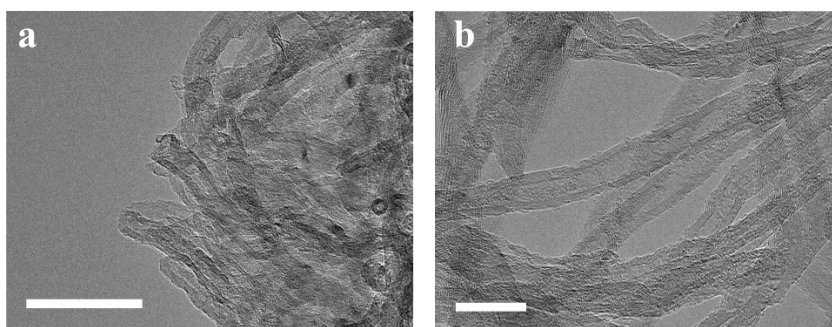

**Figure S9.** a) and b) TEM images of Ca-alginate/CNTs electrode. Scale bars: a) 50 nm, b) 20 nm.

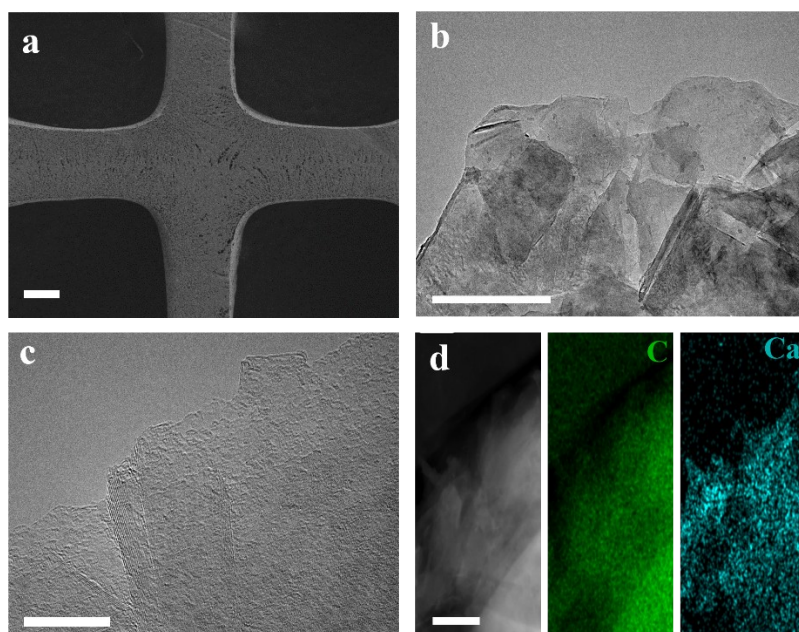

**Figure S10.** a) SEM image of the sequentially bridged Ca-alginate/graphene electrode. b,c) TEM and d) EDS mapping images of Ca-alginate/graphene electrode. Scale bars: a) 200  $\mu\text{m}$ , b) 500 nm, c) 20 nm, d) 200 nm.



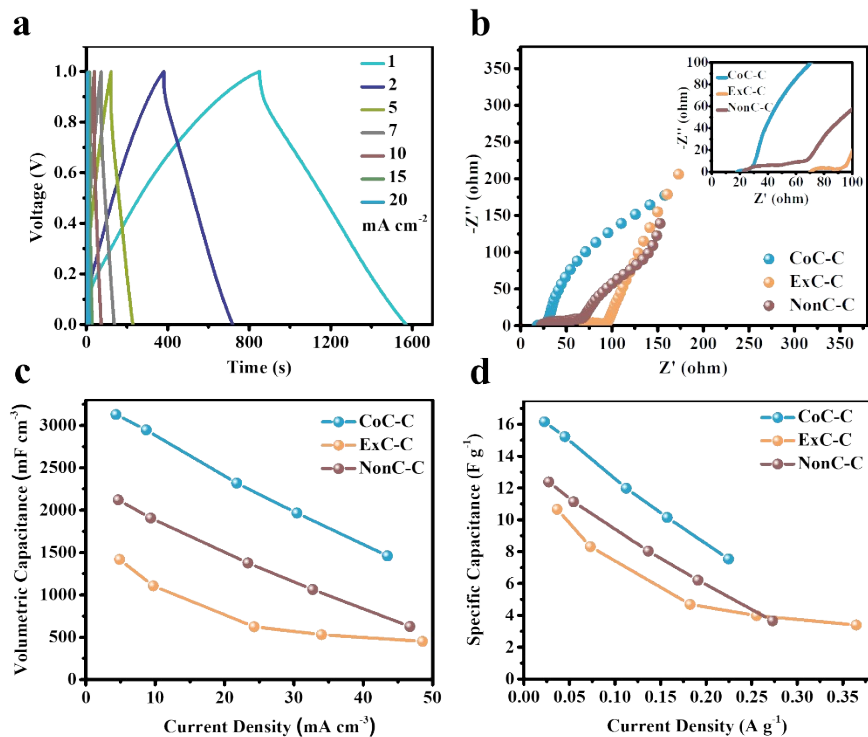

**Figure S11.** a) charge-discharge curves of CoC-C supercapacitor collected at different current densities. b) Nyquist plots of CoC-C, ExC-C, and NonC-C supercapacitors. c) volumetric capacitances and d) specific capacitances of CoC-C, ExC-C, and NonC-C supercapacitors obtained at various current densities.

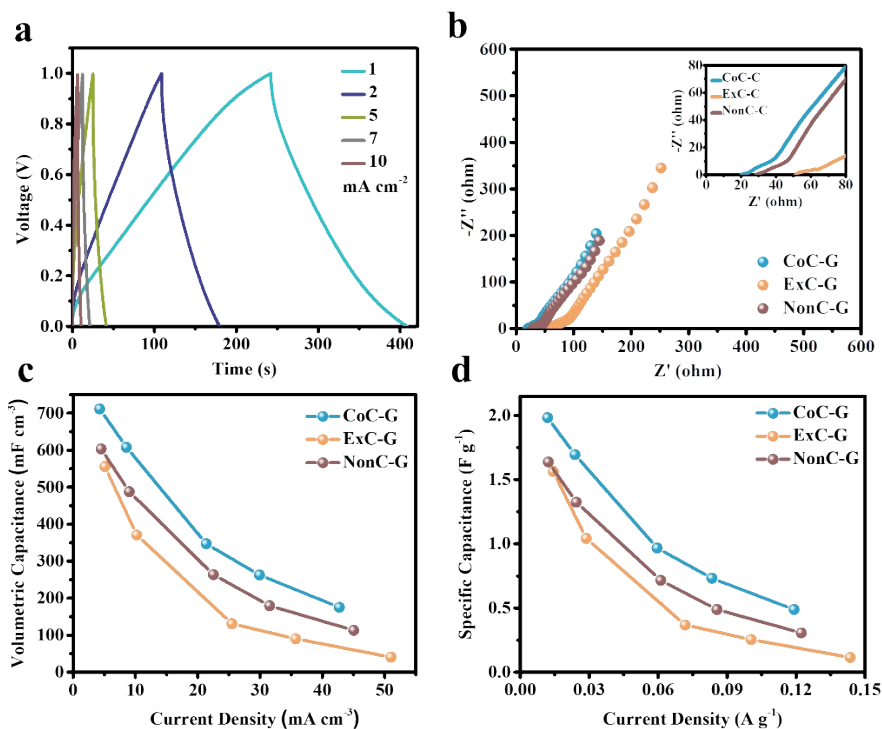

**Figure S12.** a) charge-discharge curves of CoC-G supercapacitor collected at different current densities. b) Nyquist plots of CoC-G, ExC-G, and NonC-G supercapacitors. c) volumetric capacitances and d) specific capacitances of CoC-G, ExC-G, and NonC-G supercapacitors obtained at various current densities.

## References

1. X. Liu, D. Li, X. Chen, W.-Y. Lai and W. Huang, *ACS Appl. Mater. Interfaces*, 2018, **10**, 32536-32542.
2. N. Li, G. Yang, Y. Sun, H. Song, H. Cui, G. Yang and C. Wang, *Nano Lett.*, 2015, **15**, 3195-3203.
3. Y. Chen, X.-Y. Fu, Y.-Y. Yue, N. Zhang, J. Feng and H.-B. Sun, *Appl. Surf. Sci.*, 2019, **467**, 104-111.
4. H. Moon, H. Lee, J. Kwon, Y. D. Suh, D. K. Kim, I. Ha, J. Yeo, S. Hong and S. H. Ko, *Sci. Rep.*, 2017, **7**, 1-10.
5. X. Li, H. Li, X. Fan, X. Shi and J. Liang, *Adv. Energy Mater.*, 2020, **10**, 1903794.
6. B. Wang, W. Song, P. Gu, L. Fan, Y. Yin and C. Wang, *Electrochim. Acta*, 2019, **297**, 794-804.
7. C. Zhao, C. Wang, Z. Yue, K. Shu and G. G. Wallace, *ACS Appl. Mater. Interfaces*, 2013, **5**, 9008-9014.
